# Supplementary material
Source: MDPI journal article supplement (https://www.mdpi.com/1999-4907/14/4/827)
Supplement: s1 [file s1]

**Supplementary Table S1.** Primer and probe sequences for PCR, qPCR, and qRT-PCR

| Assay                                | Type      | Gene      | Primer and probe sequences 5' 3'                          | Concentration in the reaction | Amplicon length |
|--------------------------------------|-----------|-----------|-----------------------------------------------------------|-------------------------------|-----------------|
| Photosynthesis enhancement - qPCR    | Reference | PtaRP     | Forward: ATCAAGAAGGACTCAGCCAAA                            | 250nM                         | 111bp           |
|                                      |           |           | /5HEX/AGAAATCCC/ZEN/GGGTCAAGTGCTTCA/3IABkFQ/              | 125nM                         |                 |
|                                      |           |           | Reverse: GTCCACATCCAGCGTGTA                               | 250nM                         |                 |
|                                      | GOI       | NptII     | Forward: CGTTGGCTACCCGTGATATT                             | 250nM                         | 122bp           |
|                                      |           |           | /56-FAM/CCGCTTCCT/ZEN/CGTGCTTTACGGTAT/3IABkFQ/            | 125nM                         |                 |
|                                      |           |           | Reverse: CTCGTCAAGAAGGCGATAGAAG                           | 250nM                         |                 |
|                                      | GOI       | CrGDH     | Forward: AAGGCGTACGAGCTGATG                               | 250nM                         | 116bp           |
|                                      |           |           | /5Cy5/AACCCGGGC/TAO/GTCATCCTCAA/3IAbRQSp/                 | 125nM                         |                 |
|                                      |           |           | Reverse: GAGGGCTTCAGGAACCTGAT                             | 250nM                         |                 |
|                                      | GOI       | ChMS      | Forward: ATGGAATGCCGAGAGAAG                               | 250nM                         | 104bp           |
|                                      |           |           | /5TexRd-XN/ATACTTGGTCGCCGATCAAACCC/3IAbRQSp/              | 125nM                         |                 |
|                                      |           |           | Reverse: GATGCACATGTCCACTCAGAT                            | 250nM                         |                 |
| Photosynthesis enhancement - qRT-PCR | Reference | PtaRP     | Forward: ATCAAGAAGGACTCAGCCAAA                            | 250nM                         | 111bp           |
|                                      |           |           | /5HEX/AGAAATCCC/ZEN/GGGTCAAGTGCTTCA/3IABkFQ/              | 125nM                         |                 |
|                                      |           |           | Reverse: GTCCACATCCAGCGTGTA                               | 250nM                         |                 |
|                                      | Reference | PtaAct    | Forward: CTGCAATGTATGTTGCCATCC                            | 250nM                         | 89bp            |
|                                      |           |           | /5HEX/ACTGGCATA/ZEN/CAGGGAAGGACAGC/3IABkFQ/               | 125nM                         |                 |
|                                      |           |           | Reverse: CACACCATCACCAGAATCCA                             | 250nM                         |                 |
|                                      | Reference | PtaPP2A-2 | Forward: GAACCCTAAATAGCAACCTCTAAAT                        | 250nM                         | 141bp           |
|                                      |           |           | /5HEX/CCGGACGAT/ZEN/GACCTGAATCATTCCC/3IABkFQ/             | 125nM                         |                 |
|                                      |           |           | Reverse: CTTCAAAGAGACTTTCGATTGATTG                        | 250nM                         |                 |
|                                      | Reference | PtaEF1B-1 | Forward: CATCACTACCACTCCACAAA                             | 125nM                         | 85bp            |
|                                      |           |           | /5Quasar 705/TCCTCTTTC/Nova/AATCACACTGTTTATCGCTCT/3BHQ-3/ | 125nM                         |                 |
|                                      |           |           | Reverse: TTTCAATTACTTGGAAGATGGGATG                        | 250nM                         |                 |
|                                      | GOI       | PtaPLGG1  | Forward: CAGGTGTCAAGATTGCTTCATC                           | 125nM                         | 116bp           |
|                                      |           |           | /56-FAM/CTTTGCGTG/ZEN/GCGGGTTTCACAG/3IABkFQ/              | 125nM                         |                 |
|                                      |           |           | Reverse: AGCGTCAGTCATTCTGTCTT                             | 250nM                         |                 |
|                                      | GOI       | CrGDH     | Forward: AAGGCGTACGAGCTGATG                               | 250nM                         | 116bp           |
|                                      |           |           | /5Cy5/AACCCGGGC/TAO/GTCATCCTCAA/3IAbRQSp/                 | 125nM                         |                 |
|                                      |           |           | Reverse: GAGGGCTTCAGGAACCTGAT                             | 250nM                         |                 |
|                                      | GOI       | ChMS      | Forward: ATGGAATGCCGAGAGAAG                               | 125nM                         | 104bp           |
|                                      |           |           | /5TexRd-XN/ATACTTGGTCGCCGATCAAACCC/3IAbRQSp/              | 125nM                         |                 |
|                                      |           |           | Reverse: GATGCACATGTCCACTCAGAT                            | 250nM                         |                 |
| PCR validation of transgenic status  | GOI       | NptII     | Forward: CTCTCAATTCTCTACCGTGATC                           | 500nM                         | 932bp           |
|                                      |           |           | Reverse: TTTTCCACCATGATATTGCGCAAG                         | 500nM                         |                 |
|                                      | GOI       | CrGDH     | Forward: TGCTGGATCTCGATCTGTTTTCTC                         | 500nM                         | 1662bp          |
|                                      |           |           | Reverse: TTGATGATCTCAATGGGTTGTCC                          | 500nM                         |                 |
|                                      | GOI       | ChMS      | Forward: CCGACACTCTTAATGGAAGTAAAGTG                       | 500nM                         | 1037bp          |
|                                      |           |           | Reverse: GGAGTGCTCCATTTGGGAAG                             | 500nM                         |                 |

**Supplementary Table S2.** Growth rate and copy number estimation of transgenes in transgenic events and controls. \* indicates non-transgenic control, \*\* indicates an event that has been through transformation but lacks transgenes so acts as a transformation control.

|               |          |                                        | Presence or copy number of transgene           |       |       |      |                       |                        |                 |
|---------------|----------|----------------------------------------|------------------------------------------------|-------|-------|------|-----------------------|------------------------|-----------------|
| T0 event name | C1 Group | Growth rate (GR, cm <sup>3</sup> /day) | GR increase over the best in-group control (%) | nptII | CrGDH | ChMS | Field trial selection | Extended GH evaluation | Notes           |
| CT717-2*      | 1        | 0.79                                   | 0                                              | no    | no    | no   |                       |                        |                 |
| CT717-1*      | 1        | 0.71                                   | -10                                            | no    | no    | no   |                       |                        |                 |
| 1             | 1        | 0.80                                   | 1                                              | 2     | 2     | 2    | yes                   |                        |                 |
| 2             | 1        | 0.52                                   | -34                                            | yes   | yes   | yes  |                       |                        |                 |
| 3             | 1        | 0.62                                   | -22                                            | yes   | yes   | yes  |                       |                        |                 |
| 4             | 1        | 0.64                                   | -19                                            | yes   | yes   | yes  |                       |                        |                 |
| 5             | 1        | 0.77                                   | -3                                             | 1     | 1     | 1    | yes                   |                        |                 |
| 6             | 1        | 0.68                                   | -14                                            | yes   | yes   | yes  |                       |                        |                 |
| 7             | 1        | 1.03                                   | 30                                             | 3     | 3     | 4    | yes                   |                        |                 |
| CT717-4*      | 2        | 0.86                                   | 0                                              | no    | no    | no   |                       |                        |                 |
| 8-9           | 2        | 0.25                                   | -71                                            | yes   | yes   | yes  |                       |                        |                 |
| 13-15B        | 2        | 0.99                                   | 15                                             | 1     | 1     | 1    | yes                   |                        |                 |
| 16-20**       | 2        | 0.69                                   | -19                                            | 0     | 0     | 0    | yes                   |                        |                 |
| 1C            | 2        | 0.70                                   | -18                                            | 3     | 4     | 4    | yes                   |                        |                 |
| 2G            | 2        | 0.68                                   | -20                                            | yes   | yes   | yes  |                       |                        |                 |
| 2H            | 2        | 0.82                                   | -5                                             | 1     | 1     | 1    | yes                   |                        |                 |
| 3D            | 2        | 0.79                                   | -8                                             | yes   | yes   | yes  |                       |                        | Early branching |

|                      |   |      |     |     |     |     |     |     |                    |
|----------------------|---|------|-----|-----|-----|-----|-----|-----|--------------------|
| <b>4A</b>            | 2 | 0.77 | -10 | 3   | 3   | 4   | yes |     |                    |
| <b>4B</b>            | 2 | 0.82 | -4  | 3   | 3   | 4   | yes |     |                    |
| <b>4G</b>            | 2 | 0.57 | -33 | yes | yes | yes |     |     |                    |
| <b>5C</b>            | 2 | 0.82 | -5  | 1   | 1   | 1   | yes |     |                    |
| <b>5E</b>            | 2 | 0.76 | -11 | yes | yes | yes |     |     | Early<br>branching |
| <b>8-9D**</b>        | 2 | 0.83 | -3  | 0   | 0   | 0   | yes |     |                    |
| <b>CT717-<br/>9*</b> | 3 | 0.92 | 0   | no  | no  | no  |     | yes |                    |
| <b>CT717-<br/>3*</b> | 3 | 0.83 | -9  | no  | no  | no  |     | yes |                    |
| <b>13-15E</b>        | 3 | 1.26 | 38  | 1   | 1   | 1   | yes | yes |                    |
| <b>1A</b>            | 3 | 0.64 | -30 | yes | yes | yes |     |     |                    |
| <b>3G</b>            | 3 | 0.94 | 2   | yes | yes | yes |     |     |                    |
| <b>5A</b>            | 3 | 0.95 | 4   | 1   | 1   | 1   | yes | yes |                    |
| <b>6D</b>            | 3 | 0.77 | -16 | yes | yes | yes |     |     |                    |
| <b>7F</b>            | 3 | 0.98 | 6   | yes | yes | yes |     | yes |                    |
| <b>8-9A</b>          | 3 | 1.01 | 10  | yes | yes | yes |     | yes |                    |

**Supplementary Table S3.** Relative expression level of transgenes in various transgenic events

| Event Name      | Relative Expression |       |       |
|-----------------|---------------------|-------|-------|
|                 | nptII               | ChMS  | CrGDH |
| LC0102.2C       | ++++                | +++++ | +++   |
| LC0102.2G       | +++++               | +++++ | ++    |
| LC0102.2A       | +++                 | ++++  | ++    |
| LC0102.3C       | +++                 | ++++  | ++    |
| LC0102.5F       | +++                 | ++++  | +++   |
| LC0102.21-25A   | +++                 | +++   | +++   |
| LC0102.5E       | ++++                | +++++ | +++   |
| LC0102.3H       | +++                 | ++++  | ++    |
| LC0102.13-15 B  | ++                  | ++++  | +     |
| LC0102.2H       | ++++                | ++++  | +++   |
| LC0102.5A       | ++++                | +++++ | ++    |
| LC0102.21-25E   | ++++                | +++++ | +++   |
| LC0102.68       | +++                 | ++++  | +++   |
| LC0102.5C       | +++++               | +++++ | ++++  |
| LC0102.6        | ++                  | ++    | ++    |
| LC01022         | +++                 | +++   | +++   |
| LC0102.1        | +++++               | +++   | +++   |
| LC0102.3        | ++++                | +++   | ++++  |
| LC0102.5        | +++                 | ++    | +++   |
| LC0102.4G       | +++                 | +++++ | ++    |
| LC0102.2F       | ++                  | +++++ | +     |
| LC0102.1B       | +++                 | ++++  | +     |
| LC0102.1C       | +++++               | +++   | ++++  |
| LC0102.13-15    | ++                  | +++   | +++   |
| LC0102.4        | +++                 | ++    | ++    |
| LC0102.16-20B** | -                   | -     | -     |
| CT717-1*        | -                   | -     | -     |
| LC0102.4A       | +++                 | ++++  | +     |
| LC0102.7        | ++++                | ++    | +     |
| LC0102.4B       | ++++                | +++++ | ++    |
| LC0102.8-9A     | +++                 | ++++  | +++   |
| CT717-2*        | -                   | -     | -     |
| LC0102.3F       | +++                 | +++++ | +++   |
| LC0102.3B       | +++                 | ++++  | +     |
| LC0102.3D       | ++                  | +++++ | +++   |
| LC0102.1A       | +++++               | ++++  | +++++ |
| LC0102.6D       | ++++                | +++++ | ++++  |
| LC0102.1D       | ++++                | +++++ | +++   |
| LC0102.16-20**  | -                   | -     | -     |
| LC0102.7F       | +++                 | ++++  | ++    |
| LC0102.8-9      | -                   | -     | -     |
| LC0102.13-15E   | +++                 | ++++  | +++   |
| LC0102.8-9D**   | -                   | -     | -     |

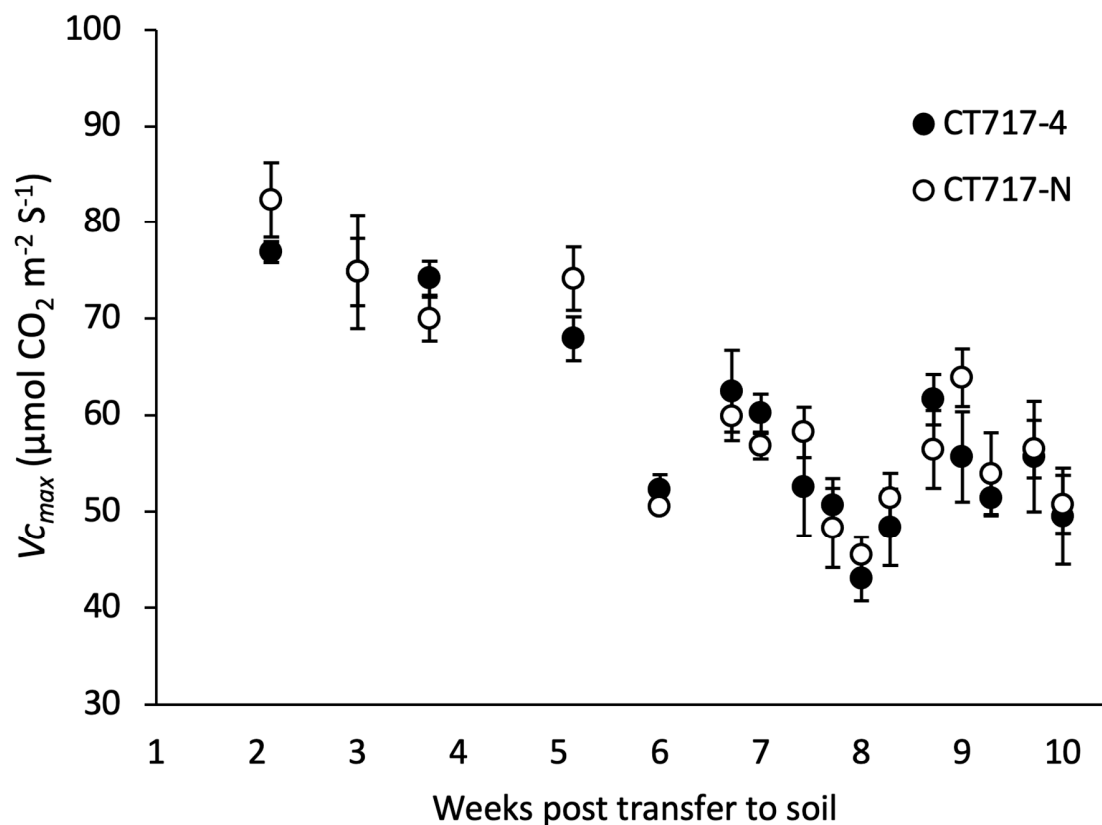

**Figure S1. Photosynthesis activity in the form of  $V_{C_{max}}$  in poplar plants after transplanting to soil pots.** Post transplanting, light intensity was gradually increased from  $50 \mu\text{mol m}^{-2}\text{s}^{-1}$  at crown height to  $300 \mu\text{mol m}^{-2}\text{s}^{-1}$  at  $50 \mu\text{mol m}^{-2}\text{s}^{-1}$  per day. Growth conditions: RH, 60%, 16h/8h light/dark cycle, with temperature at  $25^\circ\text{C}$  during the day and  $22^\circ\text{C}$  at night. Gas-exchange measurement was performed weekly starting from 2 weeks post soil. More frequent measurement was performed after 6 weeks post transplanting.  $V_{C_{max}}$  values were derived from the A-Ci curves. CT717-4, 10 ramets propagated from a soil grown CT717 mother. CT717-N, 10 ramets propagated in tissue culture and directly transferred to soil.

a

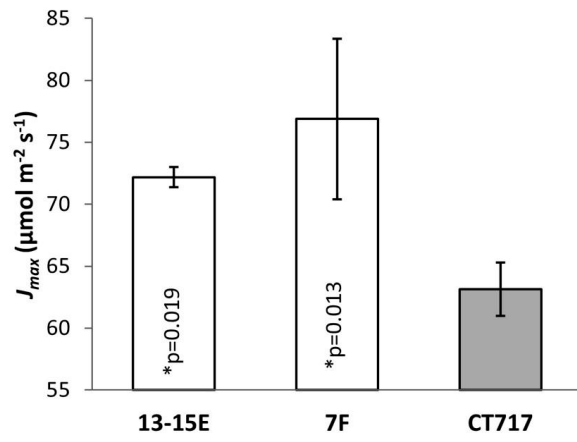

b

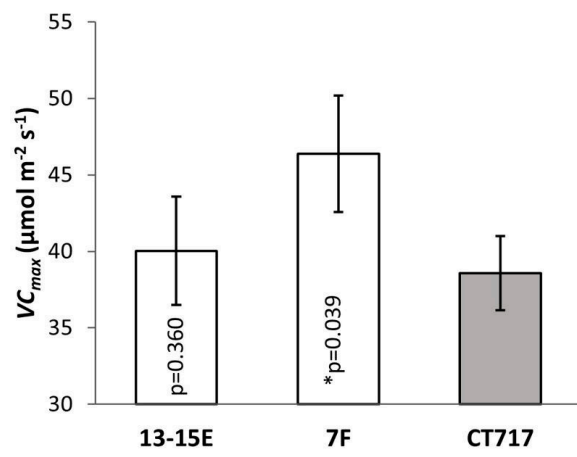

c

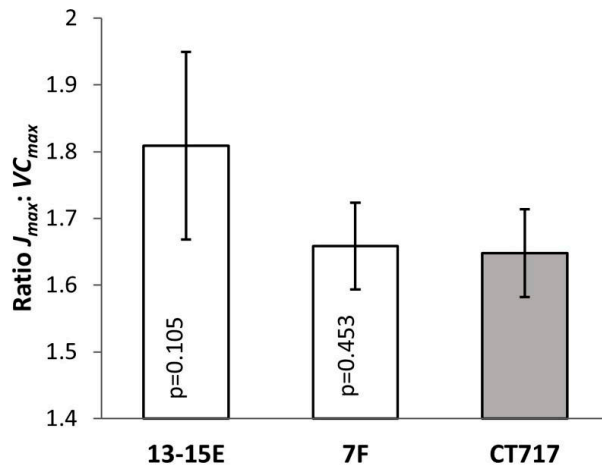

d

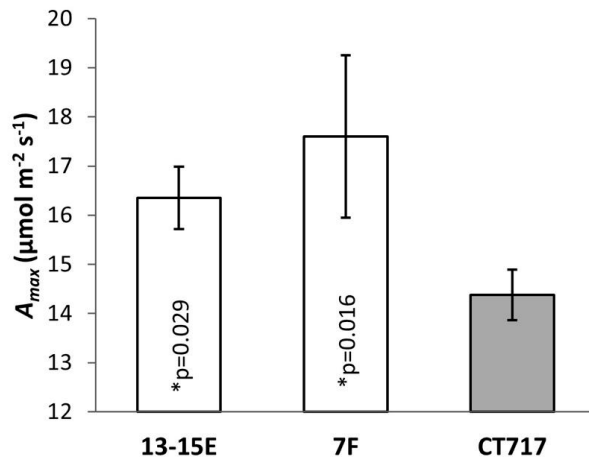

**Figure S2. Determination of photosynthetic parameters  $J_{max}$  (a),  $Vc_{max}$  (b),  $J_{max}:Vc_{max}$  ratio (c), and  $A_{max}$  (d) in 18 weeks old C1 experimental plants.** Number of ramets: CT717 non-transgenic control, 5; Event 13-15E, 2; Event 7F, 3. Error bars indicate SEM. All  $p$ -values were calculated using t-test and represent the difference compared to the non-transgenic CT717 control plants.

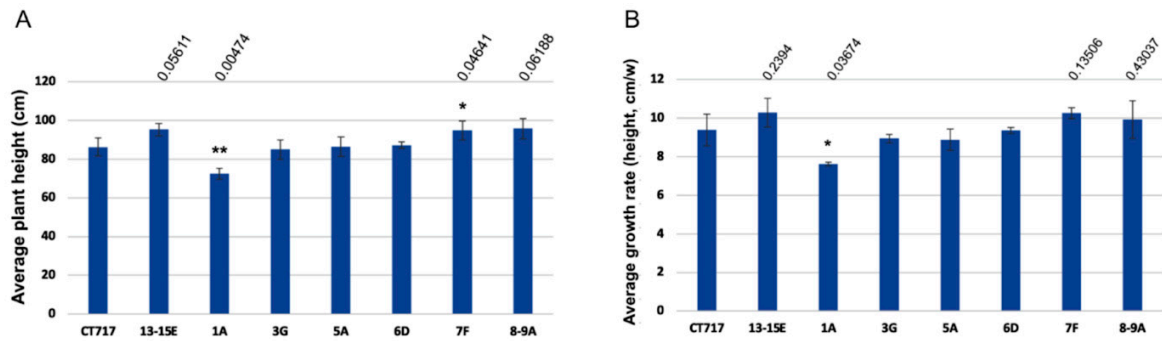

**Figure S3. Comparison of plant growth between transgenic events and non-transgenic control 9 weeks post transplanting.** Number of ramets: CT717, 5; 13-15E, 2; All others, 3 per event. **a.** Average plant height at week 9. **b.** Average plant height growth rate from week 1 post transplanting (cm/week).

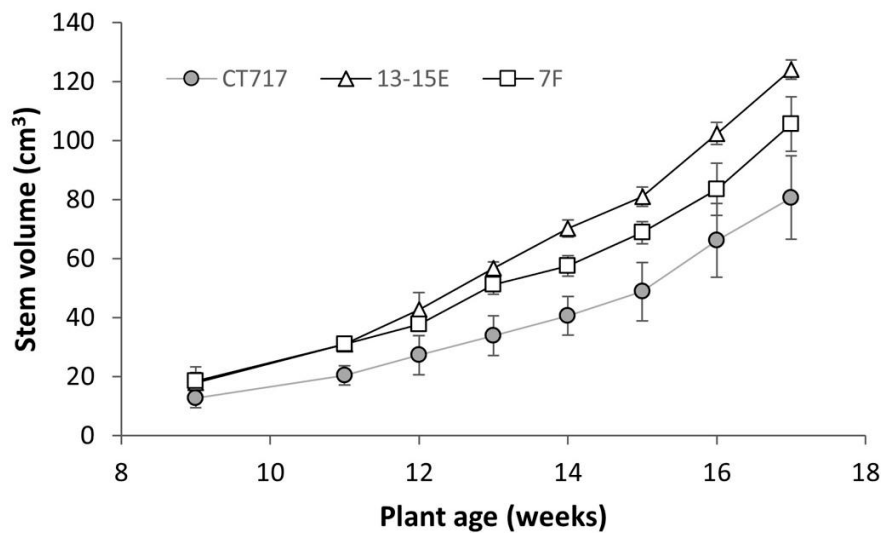

**Figure S4. Weekly stem volume growth curves of lead transgenic events 13-15E and 7F plotted against non-transgenic control CT717 from week 9 to 17.** C1 experimental plants. Number of ramets: Event 13-15E, 2; Event 7F, 3; Non-transgenic control CT717, 5.



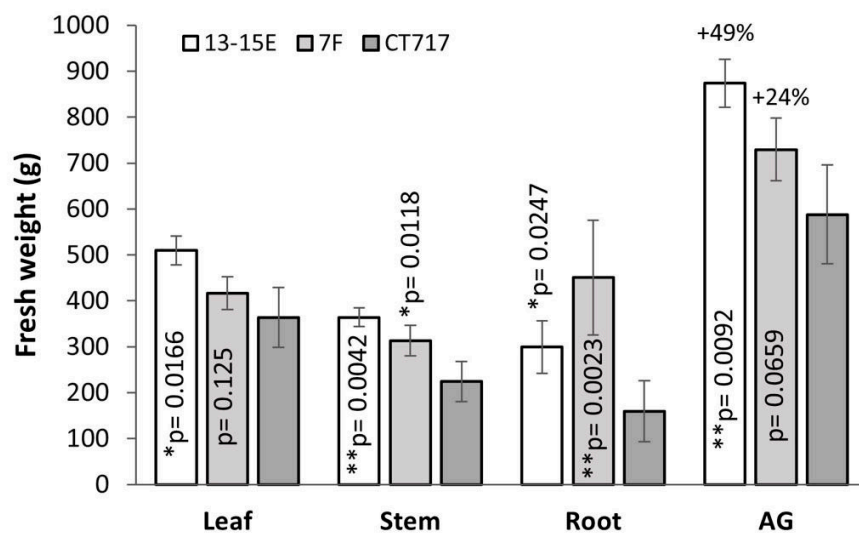

**Figure S5. Fresh weight (g) of harvested 21-weeks old C1 experimental plants.** Number of ramets: Event 13-15E, 2; Event 7F, 3; CT717 control plants, 5. All *p*-values were calculated using t-test and represent the difference compared to the non-transgenic CT717 control plants.

a.

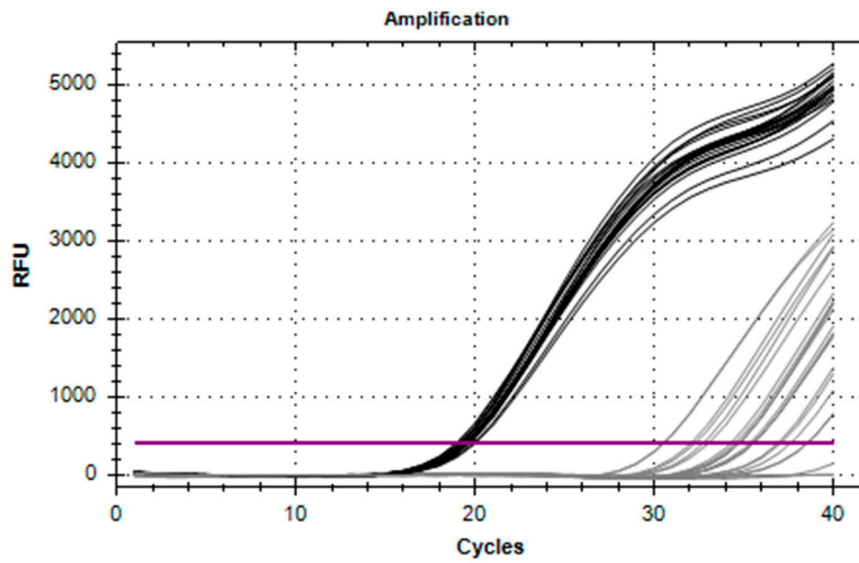

b.

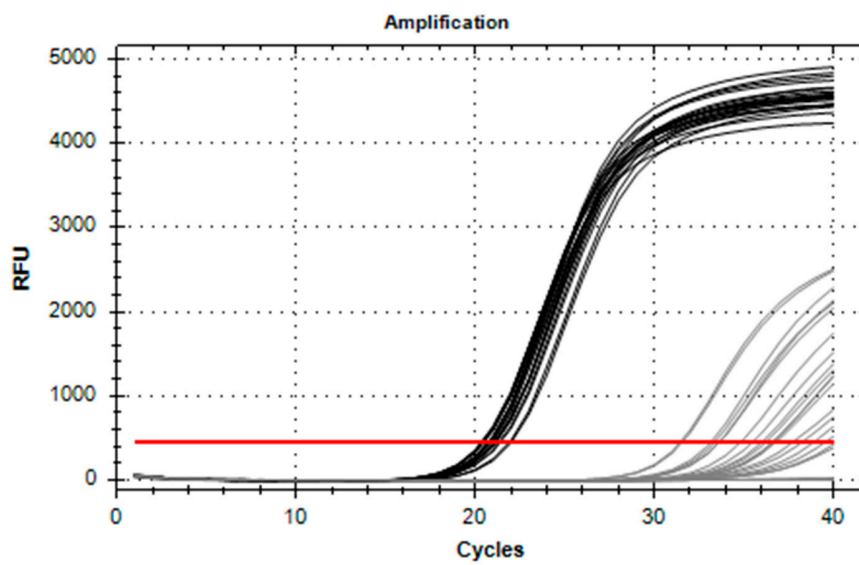

**Figure S6. GDH and MS expression in 13-15E and CT717-3.** qPCR of GDH (a) and MS (b) expression in 13-15E (in black) and CT717-3 (in gray). Number of ramets: Event 13-15E, 10; CT717 control plants, 11.

a.

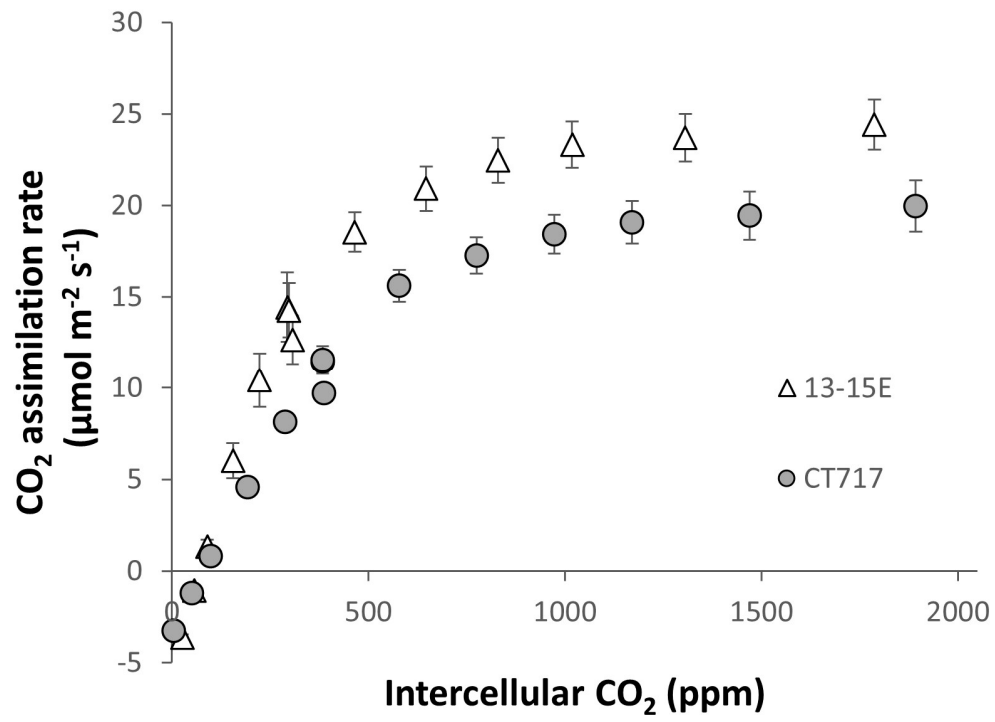

b.

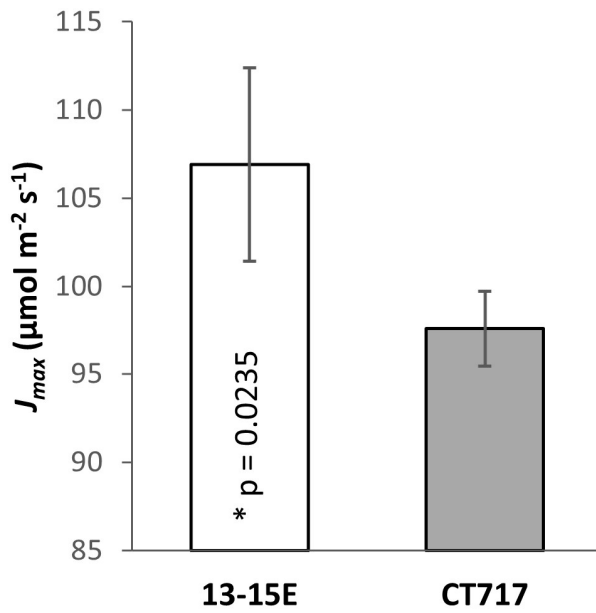

c.

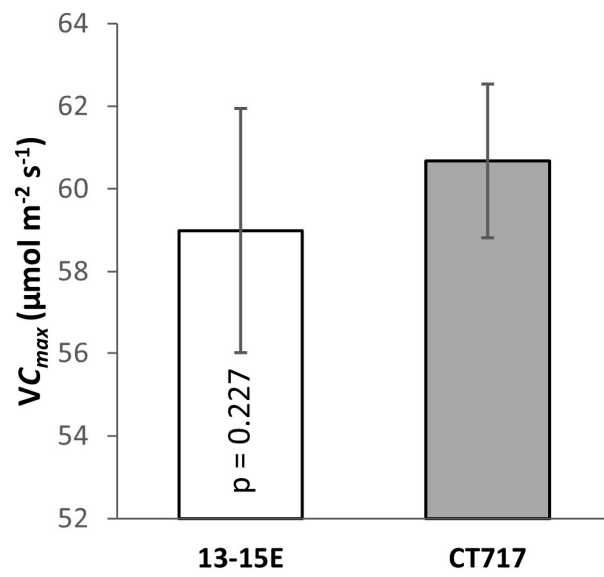

d.

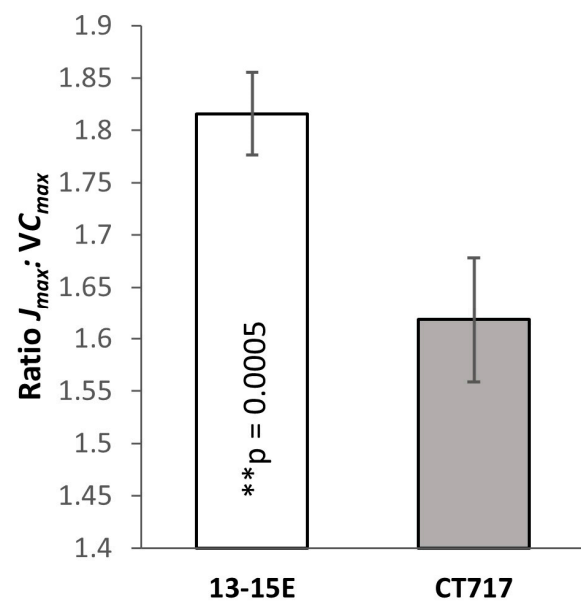

e.

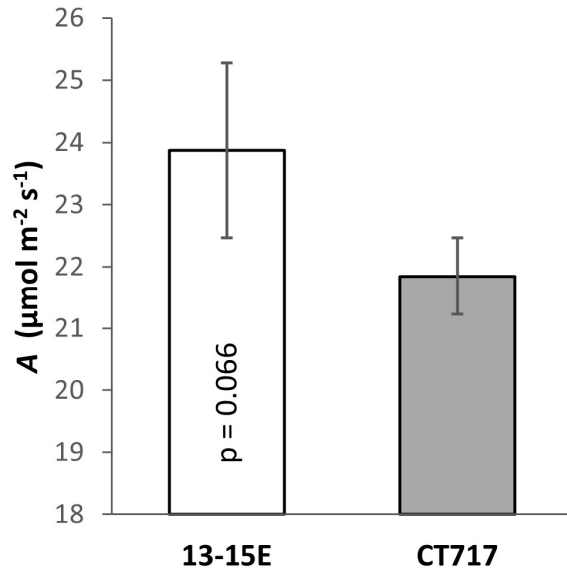

**Figure S7. Photosynthetic activity measurement from plants of another C2 repeat experiment.** a. A-Ci curve of 14 weeks old plants. Number of ramets: 3 for each event. Error bars indicate SEM. b-e. Determination of photosynthetic parameters  $J_{max}$  (b),  $V_{C_{max}}$  (c),  $J_{max}:V_{C_{max}}$  ratio (d), and  $A_{max}$  (e) in plants of 9-11 weeks old. Number of ramets: Event 13-15E, 7; Events 7 and 5C, 5 each; Transgenic escape 16-20 and non transgenic control CT717, 7 each. All  $p$ -values were calculated using t-test and represent the difference compared to the non-transgenic CT717 control plants.

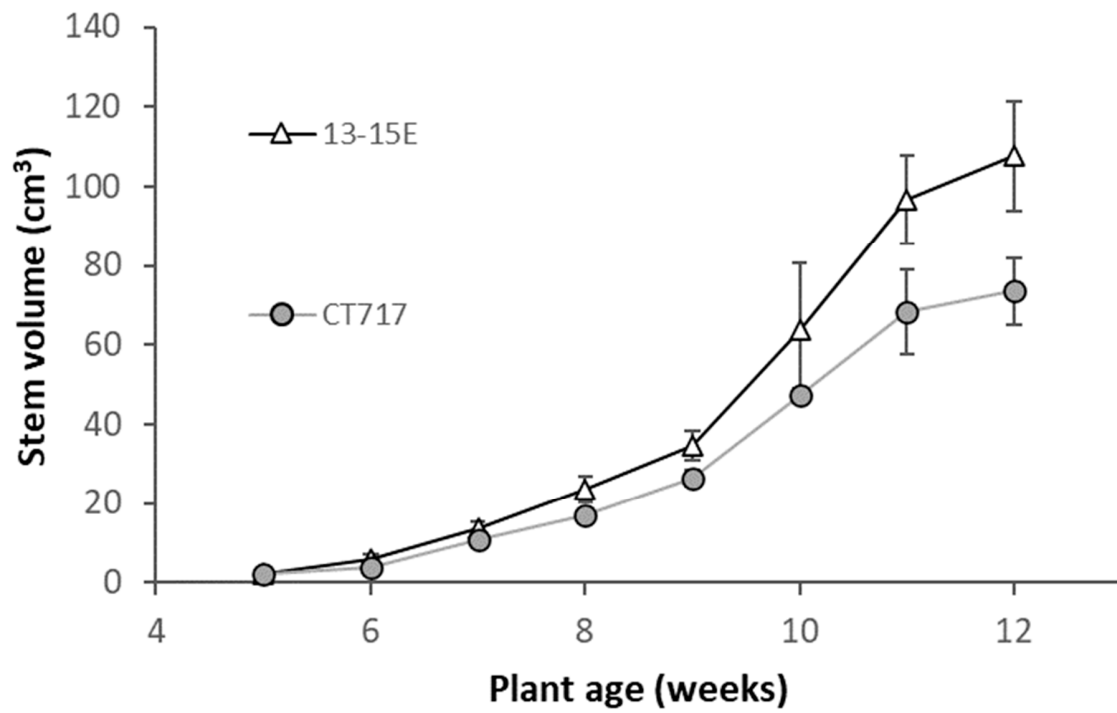

**Figure S8. Stem growth rate comparison on C2 experimental plants.** Weekly stem volume growth curves from week 4 to 12 for events 13-15E and CT717. Number of ramets 5 for each event.
